# Supplementary material
Source: Springer Nature journal article supplement (https://www.springermedizin.de/resource/supplementary/12947_2013_501_MOESM3_ESM.pdf/9555996)

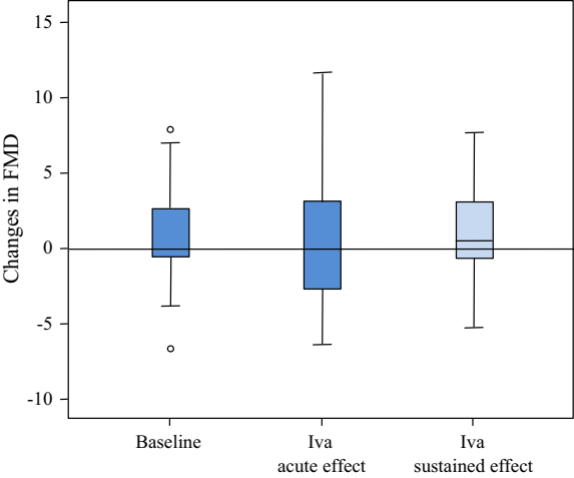

Supplement: MOESM3 [file 9555996]
